# Supplementary material for: A systematic analysis of protein palmitoylation in Caenorhabditis elegans
Source: PubMed Central journal article supplement (PMC4192757; doi:10.1186/1471-2164-15-841), 2014-10-02
Supplement: 12864_2014_6518_MOESM4_ESM.pdf [file 12864_2014_6518_MOESM4_ESM.pdf]

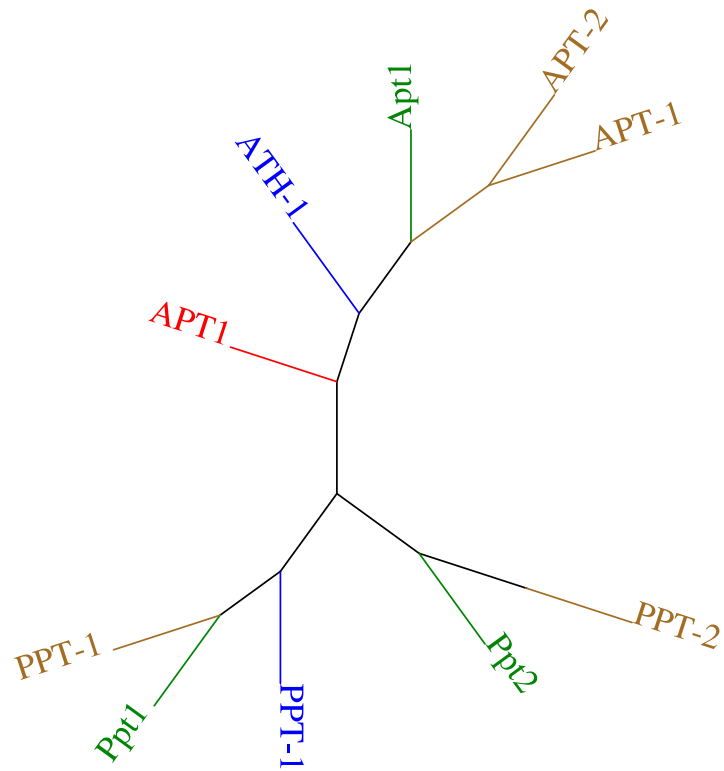

**Additional File 4. Phylogenetic tree of PPT enzymes in yeast, worms, fruit flies and humans.** The complete sequences of the known PPT family enzymes in *S. cerevisiae* (red), *C. elegans* (blue), *D. melanogaster* (green) and *H. sapiens* (brown) were subjected to phylogenetic analysis. The resulting tree was rendered and coloured using Interactive Tree of Life [66].
