# Supplementary material for: A systematic analysis of protein palmitoylation in Caenorhabditis elegans
Source: PubMed Central journal article supplement (PMC4192757; doi:10.1186/1471-2164-15-841), 2014-10-02
Supplement: 12864_2014_6518_MOESM7_ESM.pdf [file 12864_2014_6518_MOESM7_ESM.pdf]

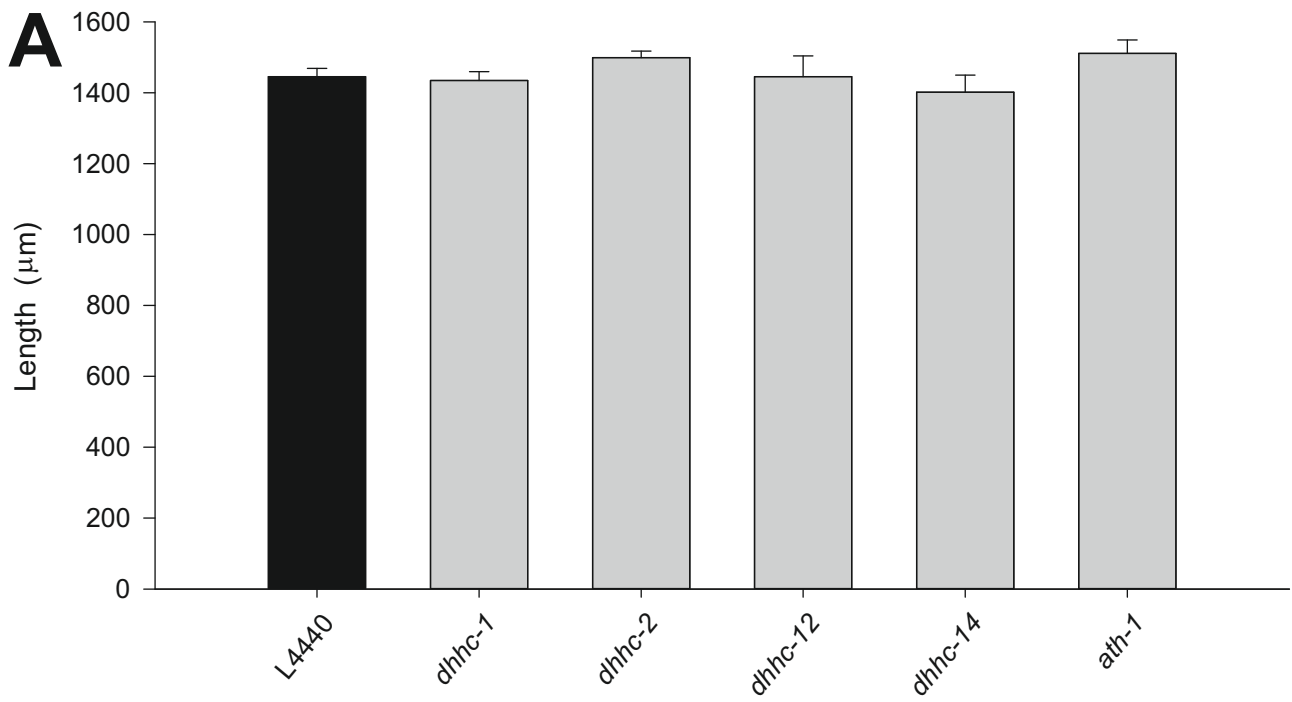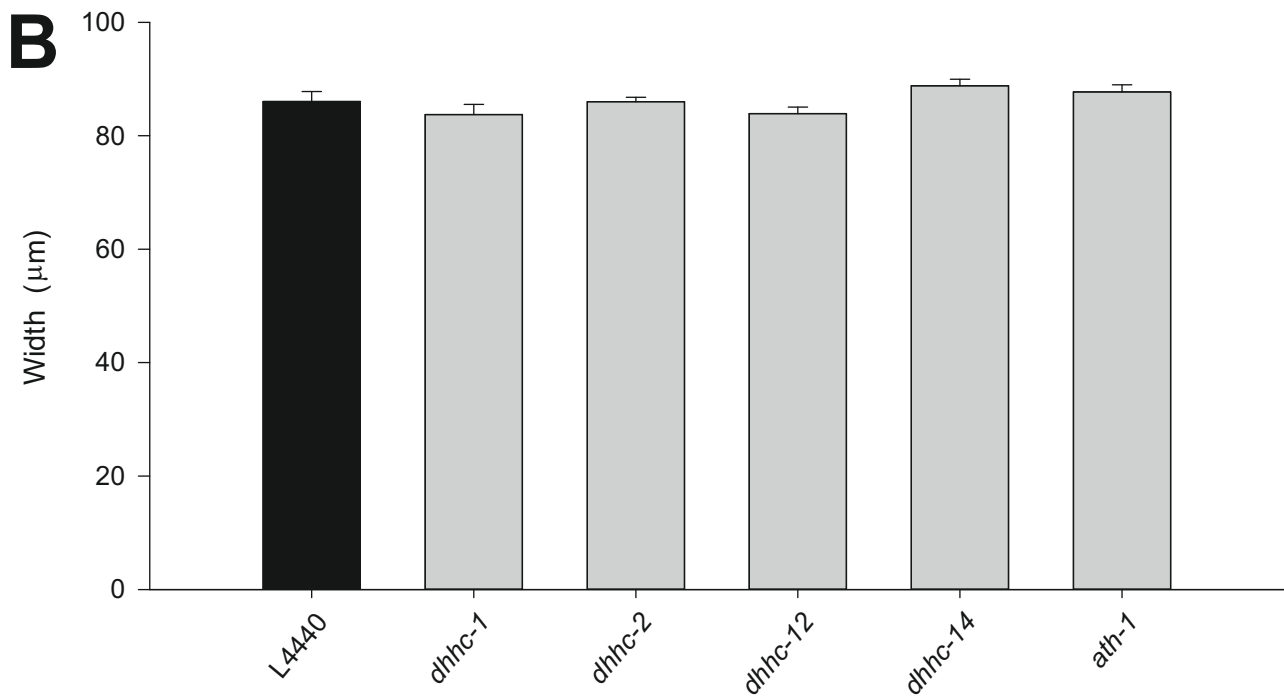

**Additional File 7. Feeding RNAi-treated worms show no differences in morphology.** *rrf-3* mutant animals were cultured with bacteria expressing dsRNA against a DHHC or PPT enzyme or a negative control empty vector (L4440). Length (A) and width (B) were measured using WormTracker software. No significant differences were found using one-way ANOVA.  $n = 4-8$  animals per RNAi treatment.
