# Supplementary material for: A systematic analysis of protein palmitoylation in Caenorhabditis elegans
Source: PubMed Central journal article supplement (PMC4192757; doi:10.1186/1471-2164-15-841), 2014-10-02
Supplement: 12864_2014_6518_MOESM10_ESM.pdf [file 12864_2014_6518_MOESM10_ESM.pdf]

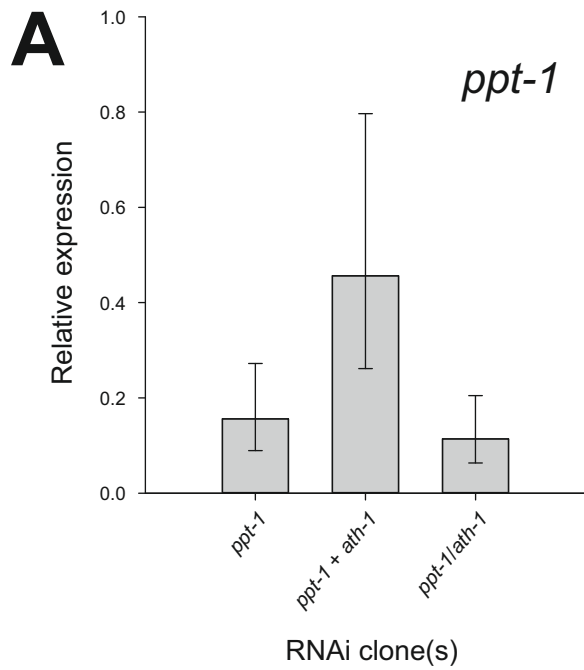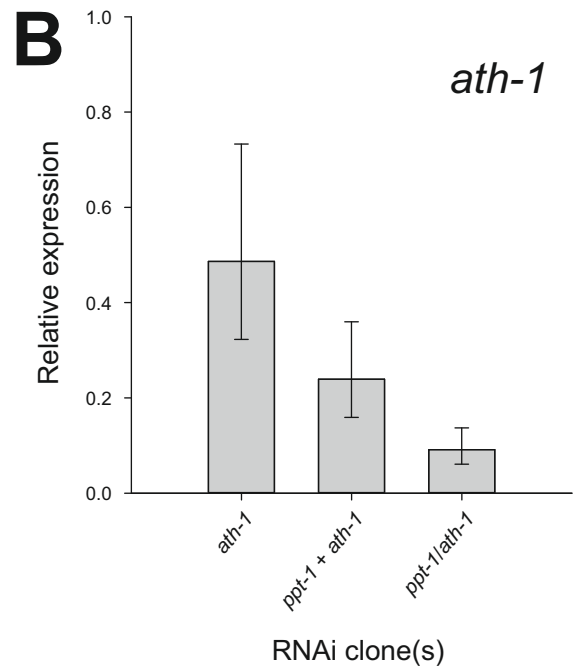

**Additional File 10. Assessment of RNAi knockdown efficiency.** Total RNA was extracted from worm pellets from plates under three different types of RNAi condition: single clones of *ppt-1* and *ath-1*; a mixture of the clones for *ppt-1* and *ath-1* (*ppt-1 + ath-1*); and a single clone expressing dsRNA against both *ppt-1* and *ath-1* (*ppt-1/ath-1*). cDNA was synthesised and subjected to quantitative PCR. The expression levels of *ppt-1* (A) and *ath-1* (B) were calculated relative to their expression in negative control worms and *act-1* expression using the  $\Delta\Delta C_T$  method. The bars represent three technical replicates  $\pm$  standard deviation.
