# Supplementary material for: A systematic analysis of protein palmitoylation in Caenorhabditis elegans
Source: PubMed Central journal article supplement (PMC4192757; doi:10.1186/1471-2164-15-841), 2014-10-02
Supplement: 12864_2014_6518_MOESM13_ESM.pdf [file 12864_2014_6518_MOESM13_ESM.pdf]

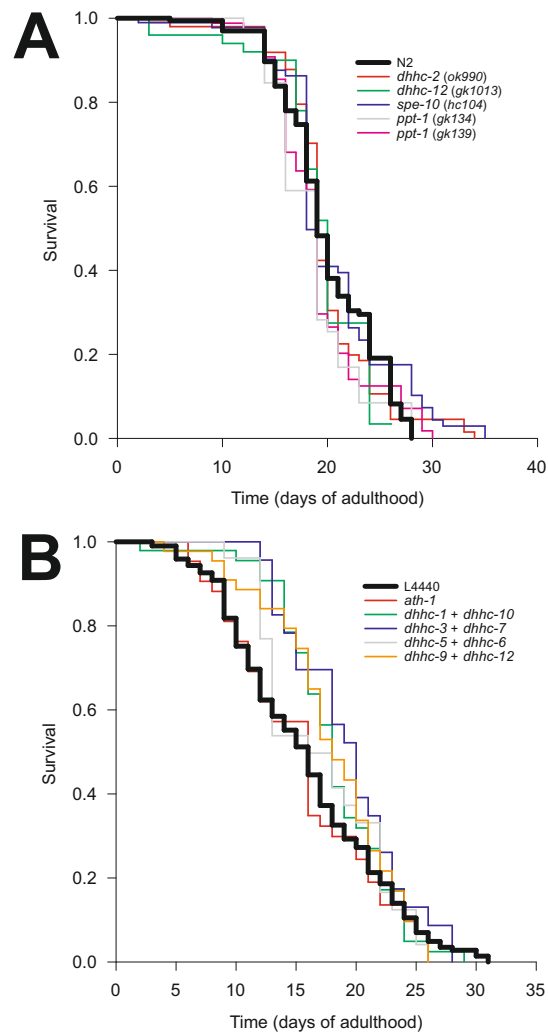

**Additional File 13. Survival plots of mutants and RNAi which do not differ significantly from controls.** Survival plots are shown of mutant strains (A) and RNAi experiments (B) which do not differ significantly from the control in at least one measure (see Tables 2 and 3). The control strain was Bristol N2 for mutants and *rrf-3* mutants fed bacteria containing the empty vector (L4440) for RNAi.
