# Supplementary material for: A systematic analysis of protein palmitoylation in Caenorhabditis elegans
Source: BMC Genomics. 2014 Oct 2;15(1):841. doi: 10.1186/1471-2164-15-841 (PMC4192757; doi:10.1186/1471-2164-15-841)
Supplement: Supplementary file 3 — Additional file 3: An alignment of homologues of the palmitoyl-protein thioestases PPT1 and APT1 in diverse species. (PDF 3 MB) [file 12864_2014_6518_MOESM3_ESM.pdf]

A

```

HS-PPT1 MASPGCLWLLAVALLPWTCASR-----ALQHLDPPAPLPLVIWHGMDSCCNPLSMG 52
MM-PPT1 MASSCSRRLAAALLPWCCAAW-----ALGHLDPSPPLVIWHGMDSCCNPMMSG 52
XT-PPT-1 --MAACRAALTALLLTLCNG-----KTEADPVPLVIWHGMDSCCNPFMSG 45
AF-PPT1 -----MTAALLCFLLAGEVLL--VAGSPVYKSNNDTVPLVLWHGMDSCCNPLSMG 49
DM-Ppt1 MISICCSRFSCILFLFLFISLVLSYIWNSTPKGGTNPVELVPVLWHGMDTCCVPFSLG 60
CE-PPT-1 -----MR-----Y-----FPLLCLLAIITAEFRNATKQVPVVMWHGMDCCCNPLSMG 44
DD-PPT1 -----MKILFFIILIIINCYL-----IQNSNSENIRFVVVLWHGLGDSGLDPLTMG 44
                                     *: *: *: *: *:

```

```

HS-PPT1 AIKKMVEKKIPGIYVLSLEIGKTLMEDVENSFFLNVNQSVTTVCQALAKDPKLQGGYNAM 112
MM-PPT1 VIKKMVEKEIPGIYVLSLEIGKNMEDVENSFFLNVNQVNMVCQILEKDKPLQGGYNAI 112
XT-PPT-1 AVKKMVEEQIPGIYVLSLEIGNSIPEDMKNSEFFLNVNQVDGVCKELAQNPPLKNGYSM 105
AF-PPT1 SIKKMIIEEVSIGIYVLSLMIGKNVVQDTENGFFMDVNEQVSMVCSQLADPKLKGGYNAM 109
DM-Ppt1 AIMNLIVEQTGGYVRSIQGIGNVLIDWQSGFFIHPNEQVDYVCKQLLQDEHLAKGYHAI 120
CE-PPT-1 SVKRLFEEQIPGVYVHSLQLGSSITKDIHGFYANTNELVYMACIRKNDPELKNYNAI 104
DD-PPT1 KLRLEIENQLPGVYVKNIAIGDSIAEDSFNSFFKNVNEQLEIVCKMLKEDTNLTSGFNAY 104
      : : : : : * * * . : * * . : * . : * . : : * * : : :

```

```

HS-PPT1 GFSQGGQFLRAVAQRCPSPPMNLISVGGHQHGQVGLPRCPGESSHICDFIRKTLNAGAY 172
MM-PPT1 GFSQGGQFLRAVAQRCPPTPPMNTLISVGGHQHGQVGLPRCPGESSHICDFIRKSLNAGAY 172
XT-PPT-1 GFSQGGQFLRAVAQRCPSPPMKNLISIGQHQQGYGFPRCPCGEISHMCDLIRKLLNYGAY 165
AF-PPT1 GFSQGGQFLRAVAQRCPSPPMKNLISIGQHQQGYGFPRCPCGESSNICDMIRKALNNGAY 169
DM-Ppt1 GFSQGGQFLRAVAQRCPNPPMNLITLGGQHQQIFGLPMCPTLTERRCDYITRLLDNAGAY 180
CE-PPT-1 GFSQGAQFLRAVAQRCPNPPMKNLISVGGHQHGQVGFAPYICIDN-IMCNGVRRLLIDLAGAY 163
DD-PPT1 GLSQGGQFLRGYVERCNDPPVYNLISLGGQHQQGVSSLPRTALNSTLCKIADDLVELGVY 164
*: **: *: *: *: *: *: *: *: *: *: *: *: *: *: *: *: *: *: *: *:

```

```

HS-PPT1 SKVVQERLVQAEYWHDPPIKEDVYRNHSIFLADINQERF-INESYKKNLMALKKFFVMVKFL 231
MM-PPT1 SKLVQERLVQAEYWHDPPIKESVYRNYSIFLADINQERF-VNESYKKNLMALKKFFVMVKFF 231
XT-PPT-1 TREVVQYVLVQAEYWHDPINEEQYRNGSIFLADINQERH-VNVSYKKNLQLEKFFVMVKFL 224
AF-PPT1 TDLVQKHLVQAEYWHDPINDELKYSIFLADINQERA-VNETYKKNLQLEKFFVMVKFL 228
DM-Ppt1 APEVQKALVQATYWHDPIMENKYLKGSFLADINNELF-INKFYIENLQKLEKFFVMVKFL 239
CE-PPT-1 LPFVQKRVVQAEYWHDPNQVEEYKKSIFLADINNENN-NNPTYKKNLQLEKFFVMVKFL 222
DD-PPT1 EKYVQNTLVPGYEWQDFPNYDYEYKKSIFLADINNVRSEKNGQTYKKNLQLEKFFVMVKFL 224
      * * * * * : * * * * * : * * * * * : * * * * * : * * * * * :

```

```

HS-PPT1 NDSIVDPVDSEWFGFYRSQAKETIPLQESTLSYTDRLGLKEMDNAGQVLVFLATEGDHLQ 291
MM-PPT1 NDSIVDPVDSEWFGFYRSQAKETIPLQESTLSYTDRLGLKEMDKAGKVLVFLATEGDHLQ 291
XT-PPT-1 NDTMVDPPDTEWFGFYRPGQSKETITLQESNLYMEDRLGLKEMEKAGRLVFLGVEGNHLQ 284
AF-PPT1 QDITVDPDTEWFGFLKLGQAKETITLQESVLYKEDRLGLAAMDKAGKLAFLASQGDHLQ 288
DM-Ppt1 NDTIVQPKESQWFGFYTTGQNKVQPFTESKVYQ--DLGLDKMHRQGGQVLVFLGVEGDHLA 297
CE-PPT-1 QDHMVVPKDSWFGFYKGDGIDITLPMNETDLYKEDRIGLKLEHESGRIFHMDVDGDHLQ 282
DD-PPT1 ADTIVVPRSEELFGFYQPQDNILPMEKTDLYTEDWIGIQQLDNEGRILKISCPGNHLQ 284
      * : * * : : * : * : : : * : * : : : * : * : : : * : * : : *

```

```

HS-PPT1 LSEWFFYAHIIIPFLG--- 306
MM-PPT1 ISKEWFTAHIIPFLK--- 306
XT-PPT-1 FSKWEFNKNIIPFLH--- 299
AF-PPT1 FTRWFHANLLPYLH--- 303
DM-Ppt1 ISKAWFIQNIIVPLLEK-- 314
CE-PPT-1 IPRSVLVNDIISKYFM--- 298
DD-PPT1 FTDQWFNQNVIPYLNQIN 303
      : : : : :

```

B

```

HS-APT1 -----MCGNNMSTPLPAIVPAARKATAAIVFLHGLGD 32
MM-APT1 -----MCGNNMSAPMPAVVPAARKATAAIVFLHGLGD 32
SS-APT1 -----MCGNSMSVPLPAIIPAARKATAAIVFLHGLGD 32
DM-Apt1 -----MAAPVIVBATVKQTATLIFMHGLGD 25
CE-ATH-1 -----MSAVSNGNPSIVSPRGEHKGTLIFLHGLGD 30
SC-APT1 -----MNGLRVAAKIQPARQTIIFLHGLGD 25
ZM-APT-1 MSSLIRLLFTLAAAI GAASLLVASLRRRAPPPGLPAKLVFSSHMAGRNRSFVLWLHGLGD 60
                                     : : : : * * * *

```

```

HS-APT1 TGHGWAEAF-----AGIRSSHIIKYICPHAPVPTLNMNVAMPWSWFDIIGLSP--DSQE 84
MM-APT1 TGHGWAEAF-----AGIKSPHIKYICPHAPVPTLNMNMAMPWSWFDIVGLSP--DSQE 84
SS-APT1 TGHGWAEAF-----AGIRTPHVKYICPHAPIKPVTLNMGMSPSWFDIIGLOT--DAEE 84
DM-Apt1 TGHGWSSAL-----AAIRPPFMKVICPTAPTQPVSLNAGFRMPWSWFDLKTLDI--GGPE 77
CE-ATH-1 QGHGWADAFK-----TEAKHDNIKFCIPHSSERPVTLNMGMMPAWFDLGLDP--NAQE 83
SC-APT1 TGSWGFLAQYLQQDPAAAFQHTNFVFPNAPELHVTANGGALMPAWFDILEWDPS-FSKV 84
ZM-APT-1 SGPANEPINR---LFSAPFERLAKWSFSPAPRAPVSCNNGFVMPWSWFDIHELPMASGPSQ 117
      * . : : : : : : : : : : : : : : : : : : : : : : : : : :

```

```

HS-APT1 DESGIKQAAENIKALIDQEVKNGIPSNRIILGGFSGGGALSLYLTALTQQKLAGVTALSC 144
MM-APT1 DESGIKQAAETVKALIDQEVKNGIPSNRIILGGFSGGGALSLYLTALTQQKLAGVTALSC 144
SS-APT1 DEAGIKQAAENIKALIDQEVKNGIPSHRIVLGGFSGGGALSLYLTALTQQKLAGVVALSC 144
DM-Apt1 DEPGIQSARDSVHGMIOKEISAGIPANRIVLGGFSGGGALALYSALTYDQPLAGVVALSC 137
CE-ATH-1 DEQQINRATQYVHQLIDAEVAAGIPASRIAVGGFSGGGALAIYAGLTYPQKLGIVGLSS 143
SC-APT1 DSDGFMNSLNSIEKTVKQIDKGIKPEQIIIGGFSGGAAALALATSVTLPWKIGGIVVALSG 144
ZM-APT-1 DETGVLKAVEKVHAMI DREVADGHPENIFVCGFSGGGALTLASVLLYPKKLGAGGVFSG 177
      * . * . : : : : : : : * : * * : * * : * * : * * : * * : *

```

```

HS-APT1 WLPLRASFPQGPIGGANRDISILQCHGDCDPLVPLMFGSLTVEKIKTLVNPANVTFKTYE 204
MM-APT1 WLPLRASFSQGPINSANRDISVLQCHGDCDPLVPLMFGSLTVERIKALINPANVTFKIYE 204
SS-APT1 WLPLRNSFPQASRNSANNEMHVLQCHGEADPLVPVPMFGCLTVEKIKTLNCPNSIIFKITYP 204
DM-Apt1 WLPLHKQFPQAKVNSD--DVPFQAHGDYDPVVPYKFGQLSASLLKSFKM--NVTFKTYS 193
CE-ATH-1 FFLQRTKFPGS--FTANNATPIFLGHGTDPLVPLQFGQMSEQYIKKFN--KVELHTYR 199
SC-APT1 FCSIPG-ILKQHKNGINVKTPIFHGHGDMDPVVPVIGLGIKAKQFYQDSCEIQNYEFKYYK 203
ZM-APT-1 WVPFSSSVTERISPEAN-KTPFLWSHGMAKVVVLEAGQAGPPFLQSGAGV--NCEFKAYP 234
      : . : : : : : : * : * * : * * : * : : : : : : : :

```

```

HS-APT1 GMMHSSCQEMMDVKQFIDKLLPPID---- 230
MM-APT1 GMMHSSCQEMMDVKHFIDKLLPPID---- 230
SS-APT1 RMPHSACPEEMMDIKQFIEKQLPPI---- 229
DM-Apt1 GLSHSSSDDEMDVDKDISKWNV----- 216
CE-ATH-1 GMQHSSCGEEMRDVKTFLSAHIAH----- 223
SC-APT1 GMAHSTVPDELDLASFIKSLSS----- 227
ZM-APT-1 DLGHSLSQDELLYLESWIKSRNASQEKDG 264
      : * * : * : : : . : :

```

**Additional File 3. Alignment of homologues of PPT1 (A) and APT1 (B) sequences of different species amongst more divergent stretches of homology between the PPT1 (A) and APT1 (B) sequences of different species amongst more divergent stretches of sequence. The catalytic triad [57, 58] is shaded in grey. Absolutely conserved residues are indicated by an asterisk, a colon indicates residues with highly similar properties and a period indicates residues with less similar properties.**

AF, *Anoplopoma fimbria*; CE, *Caenorhabditis elegans*; DD, *Dictyostelium discoideum*; DM, *Drosophila melanogaster*; HS, *Homo sapiens*; MM, *Mus musculus*; SC, *Saccharomyces cerevisiae*; SS, *Salmo salar*; XT, *Xenopus tropicalis*; ZM, *Zea mays*.
